# Supplementary material
Source: PubMed Central journal article supplement (PMC3993161)
Supplement: AEM.03887-13_zam999105234so1.pdf [file AEM.03887-13_zam999105234so1.pdf]

**A** Phosphotransacylase (*pduL* homologs) tree

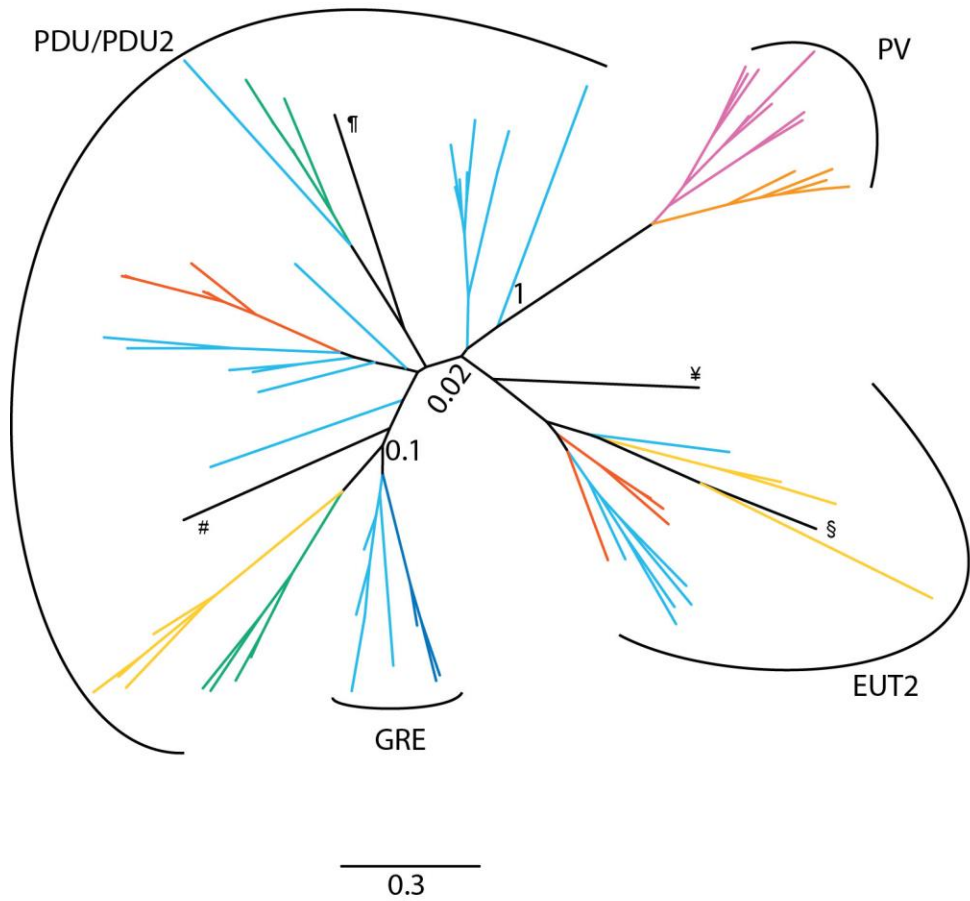

**B** Aldehyde Dehydrogenase (*pduP* homologs) tree

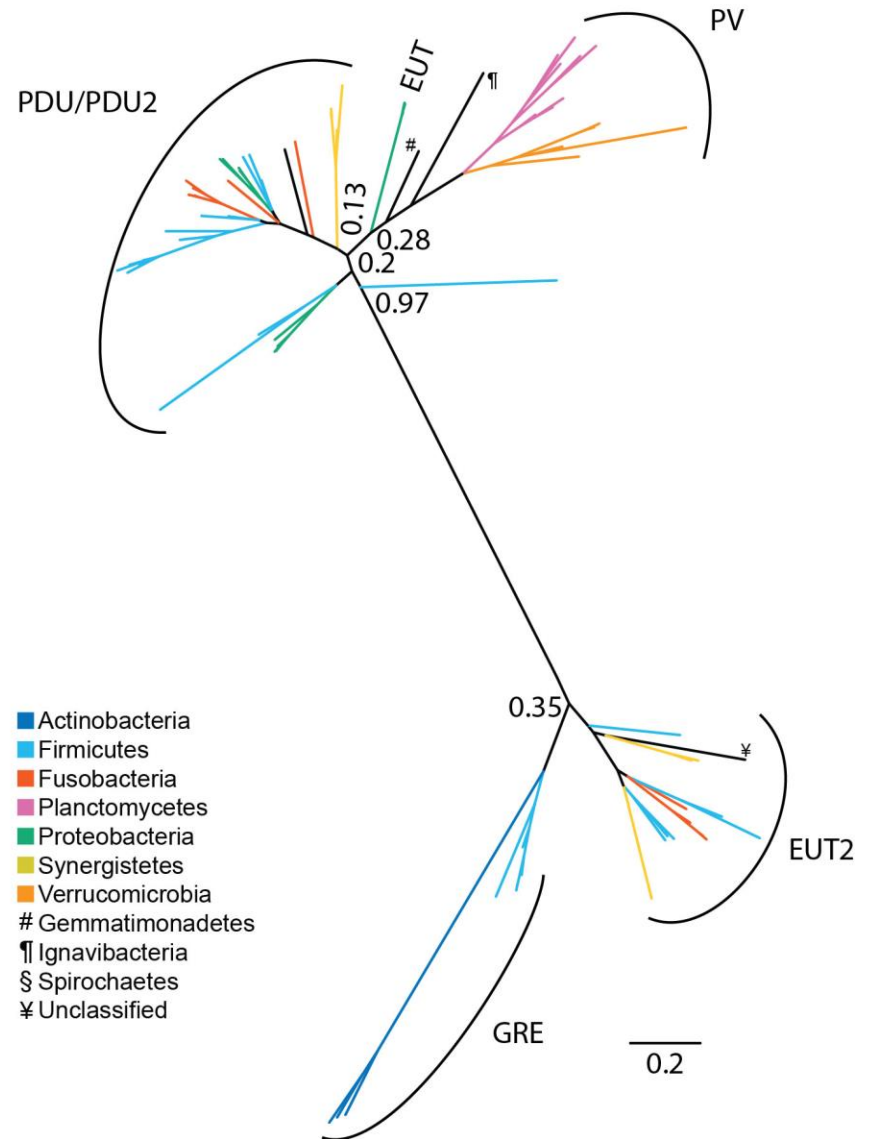

- Actinobacteria
- Firmicutes
- Fusobacteria
- Planctomycetes
- Proteobacteria
- Synergistetes
- Verrucomicrobia
- # Gemmatimonadetes
- †† Ignavibacteria
- § Spirochaetes
- ≠ Unclassified

**Figure S1.** Individual gene trees for (A) PduL homologs and (B) PduP homologs. Bootstrap values of nodes separated clades of differing function of the associated metabolosomes. Scale bars indicate number of substitutions per amino acid position.

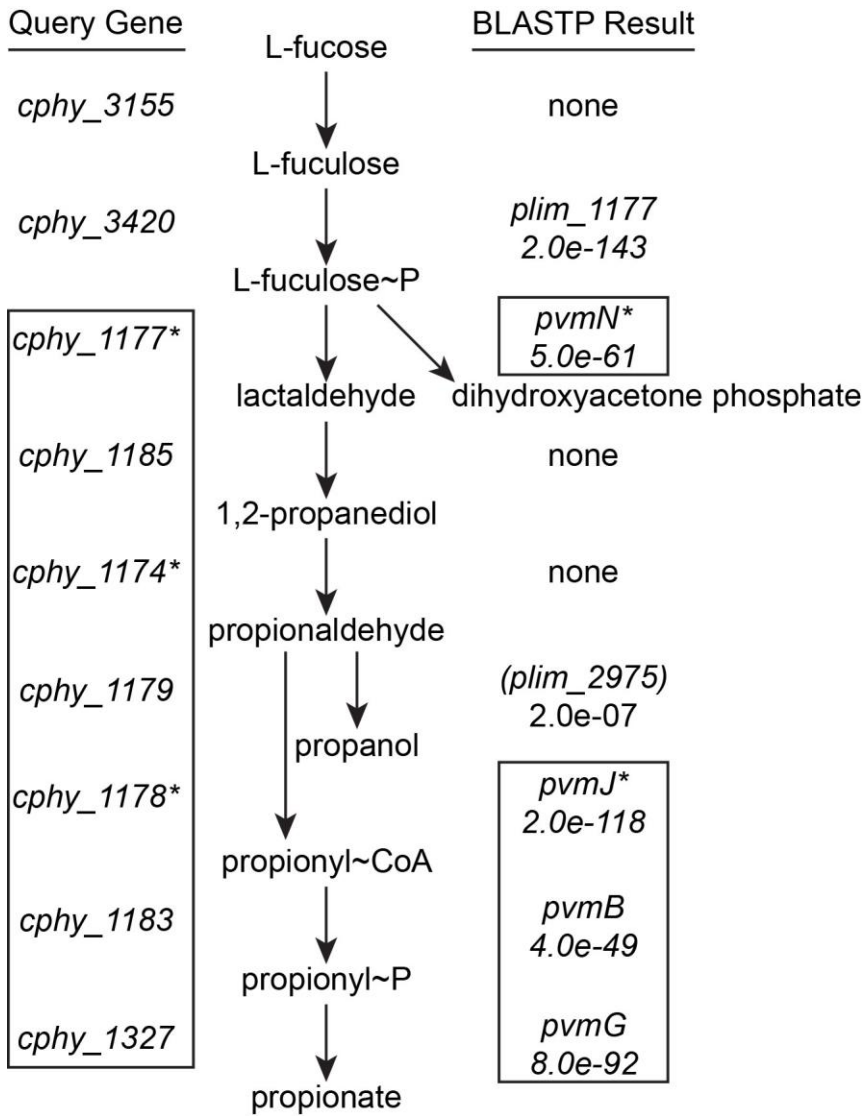

**Figure S2.** Results of pairwise comparisons of BMC-related enzymes from *P. limnophilus* and *C. phytofermentans*. The proposed degradation pathway of L-fucose in *C. phytofermentans* is shown in the center, flanked by *C. phytofermentans* (left) and *P. limnophilus* (right) genes identified by their locus tags; *C. phytofermentans* genes predicted to catalyze each reaction shown were used as queries to search the *P. limnophilus* genome for homologs using BLASTP. Genes shown in parentheses did not yield best bidirectional hits. Genes marked with an asterisk contain a predicted BMC targeting peptide sequence. Boxes are drawn around genes that are within a BMC locus.

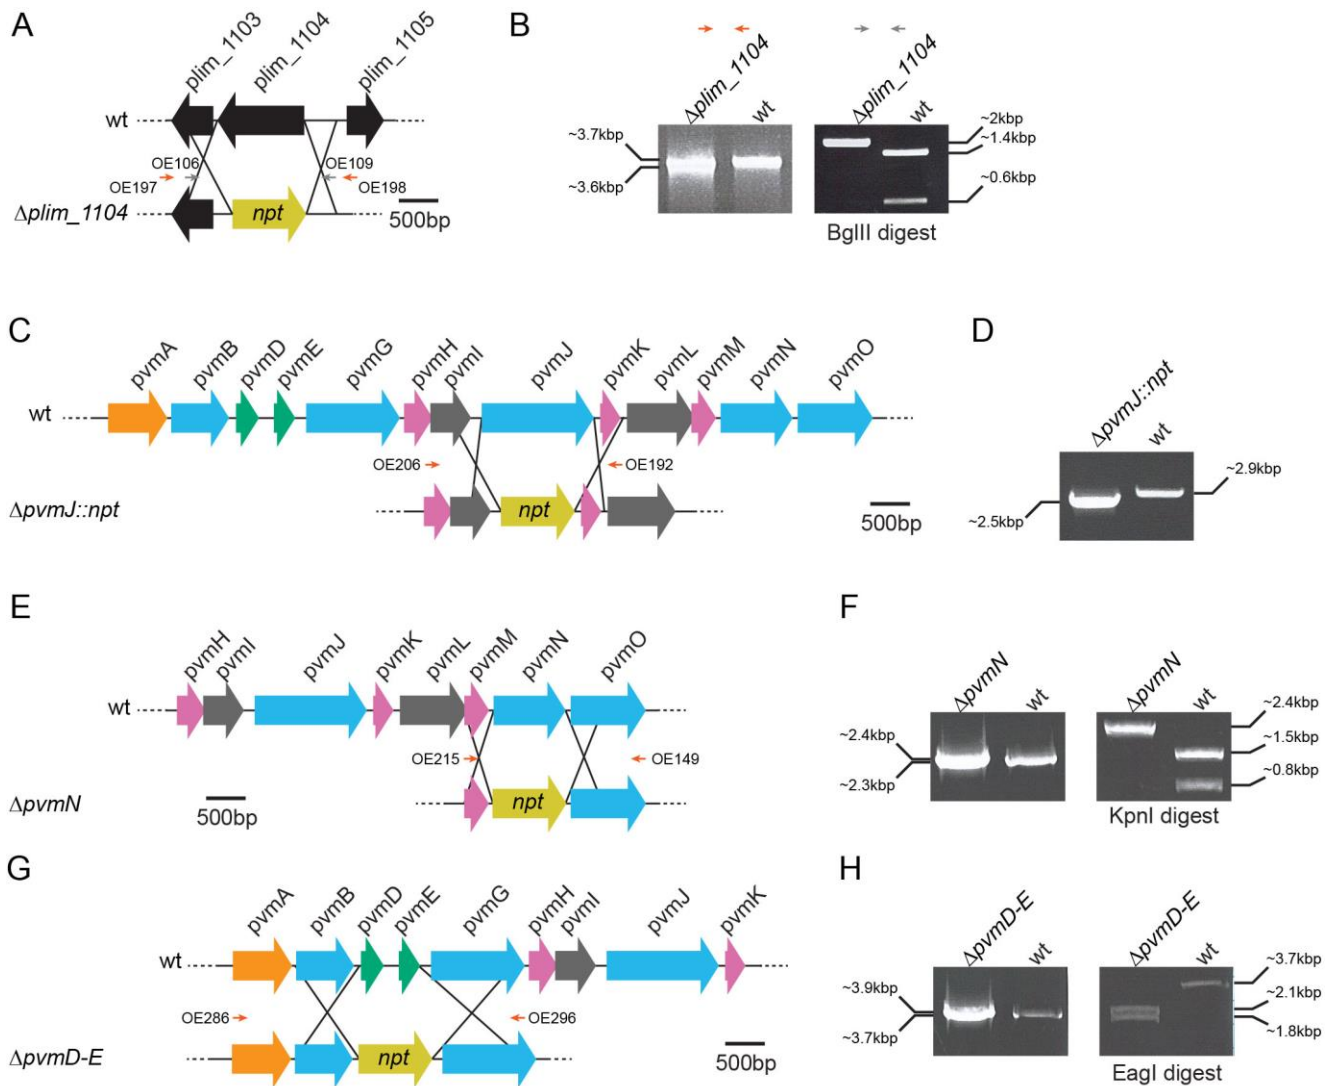

**Figure S3.** Description of mutants used in this study. A) Homologous recombination to make the  $\Delta plim_{1104}$  mutant, with primer pair OE197, 198 shown in orange arrows, and primer pair OE106, 109 shown in gray arrows. B) PCR genotyping to confirm the mutant. A BglIII restriction site in the *plim\_{1104}* gene was used to differentiate between the two genotypes. C)  $\Delta pvmJ$  mutant, with primer pair OE206, 192 depicted with orange arrows used for D) PCR genotyping. E)  $\Delta pvmN$  mutant, with primer pair OE149, 215 shown in orange arrows, used for F) PCR genotyping, with a KpnI restriction site in the *pvmN* gene used to differentiate genotypes. G)  $\Delta pvmDE$  mutant, with primer pair OE286, 296 shown in orange arrows, used for H) PCR genotyping, with the EagI restriction site in the *npt* gene used to differentiate genotypes.

$$\frac{A_{\text{mutant}} - A_{\text{wt}}}{A_{\text{wt}}} \times (A_{\text{mutant}} - A_{\text{wt}}) = \text{negative} \quad \text{positive}$$

| PM1 | 1                          | 2                           | 3                           | 4                           | 5                    | 6                                    |
|-----|----------------------------|-----------------------------|-----------------------------|-----------------------------|----------------------|--------------------------------------|
| A   | Negative Control           | L-Arabinose                 | N-Acetyl-D-Glucosamine      | D-Saccharic acid            | Succinic acid        | D-Galactose                          |
| B   | D-Serine                   | D-Sorbitol                  | Glycerol                    | <b>L-Fucose</b>             | D-Glucuronic acid    | D-Gluconic acid                      |
| C   | D-Glucose-6-Phosphate      | D-Galactonic acid-g-Lactone | DL-Malic acid               | D-Ribose                    | Tween 20             | L-Rhamnose                           |
| D   | L-Asparagine               | D-Aspartic acid             | D-Glucosaminic acid         | 1,2-Propanediol             | Tween 40             | a-Ketoglutaric acid                  |
| E   | L-Glutamine                | m-Tartaric acid             | D-Glucose-1-Phosphate       | D-Fructose-6-Phosphate      | Tween 80             | a-Hydroxyglutaric acid-g-Lactone     |
| F   | Gly-Asp                    | Citric acid                 | m-Inositol                  | D-Threonine                 | Fumaric acid         | <b>Bromosuccinic acid</b>            |
| G   | Gly-Glu                    | Tricarballic acid           | L-Serine                    | L-Threonine                 | L-Alanine            | Ala-Gly                              |
| H   | Gly-Pro                    | p-Hydroxyphenyl Acetic acid | m-Hydroxyphenyl Acetic acid | Tyramine                    | D-Psicose            | L-Lyxose                             |
| PM1 | 7                          | 8                           | 9                           | 10                          | 11                   | 12                                   |
| A   | L-Aspartic acid            | L-Proline                   | D-Alanine                   | D-Trehalose                 | D-Mannose            | Dulcitol                             |
| B   | DL-a-Glycerol Phosphate    | D-Xylose                    | L-Lactic acid               | Formic acid                 | D-Mannitol           | L-Glutamic acid                      |
| C   | D-Fructose                 | <b>Acetic acid</b>          | a-D-Glucose                 | Maltose                     | D-Melibiose          | Thymidine                            |
| D   | a-Ketobutyric acid         | a-Methyl-D-Galactoside      | a-D-Lactose                 | Lactulose                   | Sucrose              | Uridine                              |
| E   | a-Hydroxybutyric acid      | b-Methyl-D-Glucoside        | Adonitol                    | Maltotriose                 | 2'-Deoxyadenosine    | Adenosine                            |
| F   | Propionic acid             | Mucic acid                  | Glycolic acid               | Glyoxylic acid              | D-Cellobiose         | Inosine                              |
| G   | Acetoacetic acid           | N-Acetyl-D-Mannosamine      | Mono-Methylsuccinate        | Methylpyruvate              | D-Malic acid         | L-Malic acid                         |
| H   | Glucuronamide              | Pyruvic acid                | L-Galactonic acid-g-Lactone | D-Galacturonic acid         | Phenylethylamine     | 2-Aminoethanol                       |
| PM2 | 1                          | 2                           | 3                           | 4                           | 5                    | 6                                    |
| A   | Negative Control           | Chondroitin Sulfate C       | a-Cyclodextrin              | b-Cyclodextrin              | g-Cyclodextrin       | Dextrin                              |
| B   | N-Acetyl-D-Galactosamine   | N-Acetyl-Neuraminic acid    | b-D-Allose                  | Amygdalin                   | <b>D-Arabinose</b>   | D-Arabitol                           |
| C   | Gentiobiose                | L-Glucose                   | D-Lactitol                  | <b>D-Melezitose</b>         | Maltitol             | a-Methyl-D-Glucoside                 |
| D   | <b>D-Raffinose</b>         | Salicin                     | Sedoheptulosan              | L-Sorbose                   | Stachyose            | D-Tagatose                           |
| E   | Capric acid                | Caproic acid                | Citraconic acid             | Citramalic acid             | <b>D-Glucosamine</b> | 2-Hydroxybenzoic acid                |
| F   | D-Lactic acid Methyl Ester | Malonic acid                | <b>Melibionic acid</b>      | Oxalic acid                 | Oxalomalic acid      | Quinic acid                          |
| G   | Acetamide                  | L-Alaninamide               | N-Acetyl-L-Glutamic acid    | L-Arginine                  | Glycine              | L-Histidine                          |
| H   | L-Omithine                 | L-Phenylalanine             | L-Pyroglytamic acid         | L-Valine                    | D,L-Carnitine        | sec-Butylamine                       |
| PM2 | 7                          | 8                           | 9                           | 10                          | 11                   | 12                                   |
| A   | Gelatin                    | Glycogen                    | Inulin                      | Laminarin                   | Mannan               | <b>Pectin</b>                        |
| B   | L-Arabitol                 | Arbutin                     | 2-Deoxy-D-Ribose            | i-Erythritol                | D-Fucose             | 3-O-b-D-Galactopyranosyl-D-Arabinose |
| C   | b-Methyl-D-Galactoside     | 3-Methylglucose             | b-Methyl-D-Glucuronic acid  | <b>a-Methyl-D-Mannoside</b> | b-Methyl-D-Xyloside  | Palatinose                           |
| D   | Turanose                   | Xylitol                     | N-Acetyl-D-Glucosaminitol   | g-Amino-N-Butyric acid      | d-Amino Valeric acid | Butyric acid                         |
| E   | 4-Hydroxybenzoic acid      | b-Hydroxybutyric acid       | g-Hydroxybutyric acid       | a-Keto-Valeric acid         | Itaconic acid        | 5-Keto-D-Gluconic acid               |
| F   | D-Ribono-1,4-Lactone       | Sebacic acid                | Sorbic acid                 | Succinamic acid             | D-Tartaric acid      | L-Tartaric acid                      |
| G   | L-Homoserine               | Hydroxy-L-Proline           | L-Isoleucine                | L-Leucine                   | L-Lysine             | L-Methionine                         |
| H   | D,L-Octopamine             | Putrescine                  | Dihydroxyacetone            | 2,3-Butanediol              | 2,3-Butanedione      | 3-Hydroxy-2-butanone                 |

**Figure S4.** Analysis of Biolog Phenotypic Microarray data.  $A_{\text{mutant}}$  refers to the absorbance value of  $\Delta pvmJ::IN(npt)$ -inoculated plates, and  $A_{\text{wt}}$  refers to  $\Delta plim_{1104}$ . The five carbon sources with the lowest values are bolded. In decreasing order:  $\alpha$ -methyl-D-mannoside, D-melezitose, L-fucose, D-raffinose, Pectin.

$\Delta\text{plim}_{1104}$ , PM1 plate

|   | 1      | 2      | 3      | 4      | 5      | 6      | 7      | 8      | 9      | 10     | 11     | 12     |
|---|--------|--------|--------|--------|--------|--------|--------|--------|--------|--------|--------|--------|
| A | 0      | -0.007 | 0.102  | -0.018 | -0.011 | 0.145  | 0.027  | 0.091  | 0.049  | 0.131  | 0.136  | -0.001 |
| B | -0.002 | -0.017 | -0.006 | 0.069  | 0.172  | 0.031  | 0.012  | 0.081  | 0.042  | -0.076 | 0.029  | 0.029  |
| C | -0.004 | -0.077 | -0.021 | 0.043  | -0.076 | 0.026  | 0.012  | 0.006  | 0.179  | 0.191  | 0.093  | -0.08  |
| D | 0.022  | -0.091 | 0.018  | 0.025  | -0.065 | 0.016  | -0.087 | 0.168  | 0.116  | 0.12   | 0.187  | -0.079 |
| E | 0.072  | -0.058 | -0.029 | 0.006  | -0.061 | -0.013 | -0.082 | 0.245  | -0.007 | 0.127  | -0.094 | -0.096 |
| F | 0.035  | -0.074 | 0.026  | -0.039 | 0.013  | 0.001  | -0.08  | -0.052 | -0.094 | -0.075 | 0.141  | -0.096 |
| G | 0.059  | -0.083 | 0.035  | 0.04   | -0.031 | -0.013 | -0.045 | 0.107  | 0.031  | -0.003 | -0.029 | -0.023 |
| H | -0.037 | -0.089 | -0.09  | -0.094 | -0.025 | 0.068  | 0.158  | 0.1    | -0.077 | -0.09  | -0.066 | -0.076 |

$\Delta\text{pvmJ}::\text{IN}(npt)$ , PM1 plate

|   | 1     | 2      | 3      | 4      | 5      | 6     | 7      | 8     | 9      | 10     | 11     | 12     |
|---|-------|--------|--------|--------|--------|-------|--------|-------|--------|--------|--------|--------|
| A | 0     | 0.06   | 0.112  | 0.007  | 0.025  | 0.152 | 0.033  | 0.079 | 0.052  | 0.107  | 0.065  | -0.003 |
| B | 0.008 | 0.028  | 0.015  | -0.012 | 0.119  | 0.04  | 0.04   | 0.154 | 0.037  | -0.007 | 0.037  | 0.022  |
| C | 0.006 | -0.004 | 0.011  | 0.129  | -0.003 | 0.007 | 0.025  | 0.058 | 0.134  | 0.126  | 0.094  | -0.008 |
| D | 0.037 | -0.01  | 0.025  | 0.036  | 0.002  | 0.031 | -0.008 | 0.142 | 0.115  | 0.11   | 0.134  | -0.002 |
| E | 0.043 | -0.002 | 0.01   | 0.02   | 0.003  | 0.014 | -0.008 | 0.17  | 0.027  | 0.06   | -0.019 | -0.022 |
| F | 0.027 | -0.005 | 0.046  | 0.005  | 0.012  | 0.029 | -0.003 | 0.006 | -0.018 | 0.004  | 0.106  | -0.02  |
| G | 0.021 | -0.014 | 0.048  | 0.044  | -0.001 | 0.008 | 0.022  | 0.084 | 0.028  | 0.016  | 0.001  | 0      |
| H | 0.026 | -0.013 | -0.012 | -0.017 | 0.013  | 0.164 | 0.103  | 0.053 | -0.013 | -0.012 | 0.037  | -0.008 |

$\Delta\text{plim}_{1104}$ , PM2 plate

|   | 1      | 2      | 3      | 4      | 5      | 6      | 7      | 8      | 9      | 10     | 11     | 12     |
|---|--------|--------|--------|--------|--------|--------|--------|--------|--------|--------|--------|--------|
| A | 0      | 0      | -0.045 | -0.018 | -0.026 | -0.067 | 0.011  | -0.011 | 0.007  | 0.009  | 0.053  | 0.204  |
| B | 0.255  | 0.002  | -0.063 | -0.002 | 0.014  | -0.059 | 0.031  | -0.001 | 0.104  | 0.011  | 0.034  | -0.042 |
| C | 0.18   | 0.118  | 0.218  | 0.178  | 0.171  | 0.241  | 0.167  | 0.002  | 0.053  | 0.262  | 0.035  | 0.129  |
| D | 0.164  | 0.07   | -0.004 | -0.04  | 0.052  | 0.051  | 0.194  | 0.005  | 0.017  | -0.062 | -0.071 | -0.058 |
| E | -0.073 | -0.076 | -0.07  | -0.056 | 0.017  | -0.074 | -0.074 | -0.054 | 0.016  | -0.071 | -0.076 | -0.023 |
| F | -0.011 | -0.017 | 0.11   | -0.044 | -0.037 | 0.009  | -0.061 | -0.058 | -0.012 | -0.01  | -0.022 | -0.068 |
| G | 0.009  | -0.027 | 0.013  | -0.049 | -0.006 | 0      | -0.027 | 0.071  | -0.055 | -0.051 | -0.018 | -0.067 |
| H | -0.017 | -0.069 | -0.024 | -0.05  | -0.002 | -0.048 | -0.069 | -0.001 | 0.109  | 0.014  | -0.048 | -0.019 |

$\Delta\text{pvmJ}::\text{IN}(npt)$ , PM2 plate

|   | 1      | 2      | 3      | 4      | 5      | 6      | 7      | 8      | 9      | 10     | 11     | 12     |
|---|--------|--------|--------|--------|--------|--------|--------|--------|--------|--------|--------|--------|
| A | 0      | 0.01   | -0.007 | 0      | 0.002  | -0.011 | 0.014  | 0.014  | 0.007  | -0.013 | 0.015  | 0.041  |
| B | 0.192  | 0.003  | 0.009  | 0.049  | 0.082  | -0.007 | 0.025  | 0.053  | 0.171  | 0.015  | 0.021  | 0.013  |
| C | 0.134  | 0.058  | 0.124  | 0.068  | 0.12   | 0.186  | 0.151  | 0.007  | 0.048  | 0.144  | 0.038  | 0.076  |
| D | 0.056  | 0.096  | 0.001  | 0.005  | 0.033  | 0.035  | 0.126  | 0.012  | 0.016  | -0.008 | -0.011 | -0.008 |
| E | -0.014 | -0.011 | -0.011 | -0.007 | 0.076  | -0.011 | -0.016 | -0.013 | 0.015  | -0.01  | -0.022 | 0.086  |
| F | -0.002 | 0.002  | 0.044  | 0.017  | 0.027  | 0.011  | -0.011 | -0.012 | 0.054  | -0.002 | -0.004 | -0.011 |
| G | 0.002  | -0.002 | 0.01   | 0.009  | 0.01   | 0.016  | 0.001  | 0.052  | -0.011 | -0.005 | -0.007 | 0.006  |
| H | 0.003  | -0.014 | -0.009 | -0.011 | -0.004 | 0.001  | -0.015 | 0.001  | 0.193  | -0.001 | 0.006  | 0.009  |

**Figure S5.** Raw Biolog Phenotypic Microarray data for *Δplim\_1104* and *ΔpvmJ::IN(npt)* inoculated into plates PM1 and PM2, and incubated for five days. Values are absorbance at 590nm, well A1 (no carbon source) was used to blank each plate. Carbon source identity key is available in Figure S4.

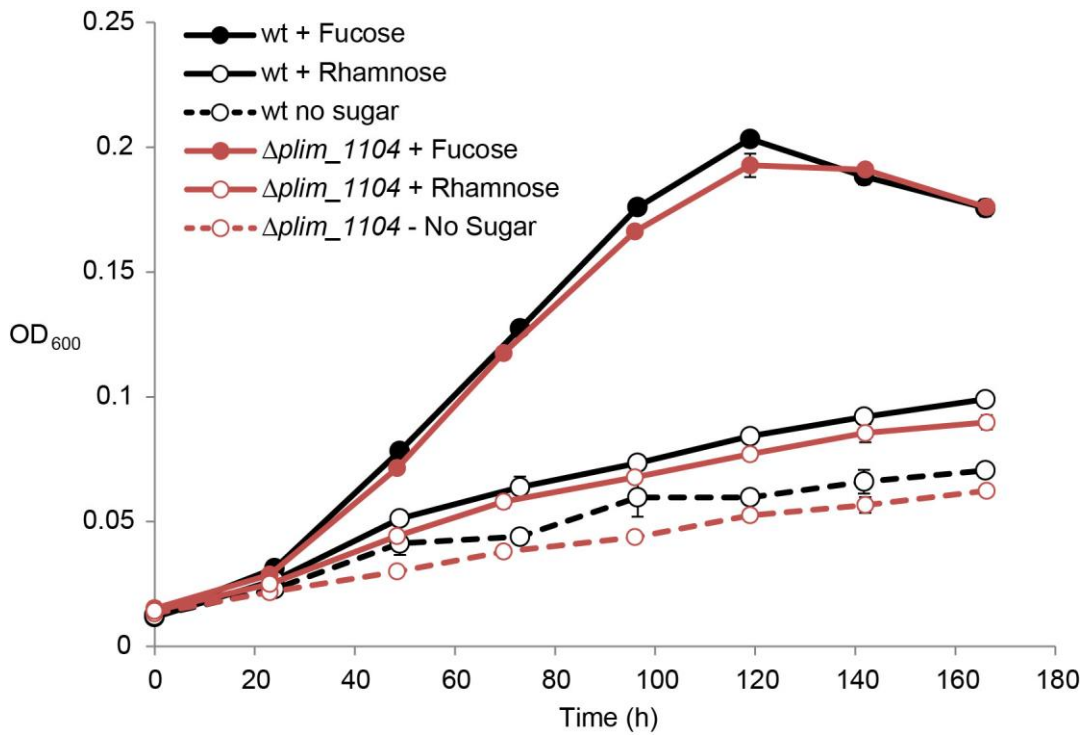

**Figure S6.** Growth profile comparison between wild-type (black) and  $\Delta plim_{1104}$  (red), on L-fucose (solid circles), L-rhamnose (open circles), and no sugar added (open circles with dashed line). Data points are an average of three independently grown liquid cultures (n=3), and error bars depict one standard deviation.

**Table S1.** New nomenclature of BMC-related genes of the PVM BMC gene cluster

| <b>Gene Name</b> | <b>Representative Accession Number</b> | <b>Updated Annotation</b>     | <b>Note</b>                                                                                                                             |
|------------------|----------------------------------------|-------------------------------|-----------------------------------------------------------------------------------------------------------------------------------------|
| <i>pvmA</i>      | YP_003629787                           | Transcriptional regulator     | Not present in <i>O. TAV</i> species or <i>O. terrae</i> .<br>Inverted in the <i>Verrucomicrobia</i> species SCGC AAA164-E04 and DG1235 |
| <i>pvmB</i>      | YP_003629786                           | Phosphotransacylase           |                                                                                                                                         |
| <i>pvmC</i>      | NP_865042                              | Hypothetical Protein          | No function prediction, only present in <i>R. baltica</i>                                                                               |
| <i>pvmD</i>      | YP_003629785                           | BMC-H shell protein           |                                                                                                                                         |
| <i>pvmE</i>      | YP_003629784                           | BMC-H shell protein           |                                                                                                                                         |
| <i>pvmF</i>      | YP_004178760                           | BMC-H shell protein           | Only present in <i>S. acidiphila</i> and <i>I. pallida</i>                                                                              |
| <i>pvmG</i>      | YP_003629783                           | Lactate Kinase                |                                                                                                                                         |
| <i>pvmH</i>      | YP_003629782                           | BMC-P shell protein           |                                                                                                                                         |
| <i>pvmI</i>      | YP_003629781                           | Hypothetical Protein          | No function prediction, only present in the Planctomyces genus                                                                          |
| <i>pvmJ</i>      | YP_003629780                           | Lactaldehyde Dehydrogenase    | Contains BMC targeting peptide                                                                                                          |
| <i>pvmK</i>      | YP_003629779                           | BMC-P shell protein           |                                                                                                                                         |
| <i>pvmL</i>      | YP_003629778                           | Hypothetical Protein          | No function prediction, not present in <i>I. pallida</i> or the <i>Verrucomicrobia</i>                                                  |
| <i>pvmM</i>      | YP_003629777                           | BMC-P shell protein           |                                                                                                                                         |
| <i>pvmN</i>      | YP_003629776                           | Aldolase                      | Contains BMC targeting peptide                                                                                                          |
| <i>pvmO</i>      | YP_003629775                           | 1,2-propanediol dehydrogenase | Not present in <i>P. brasiliensis</i>                                                                                                   |



**Table S2.** List of Oligonucleotides used in this study

| <b>Primer Name</b> | <b>Description</b>                                | <b>Sequence</b>                            |
|--------------------|---------------------------------------------------|--------------------------------------------|
| OE053              | <i>npt</i> promoter forward primer                | TATAGAATTCAGATCTCGGAATTGCCAGCT             |
| OE054              | <i>npt</i> reverse primer                         | TATAGGATCCTCAGAAGAACTCGTC                  |
| OE106              | <i>plim_1104</i> upstream region forward primer   | TATAGAATTCATGAGATCTGCCACAACCTTTTGTTCAGTCG  |
| OE107              | <i>plim_1104</i> upstream region reverse primer   | TATAGGATCCTCGAAAAGCTTATCGCCAAT             |
| OE108              | <i>plim_1104</i> downstream region forward primer | TATAGAATTCATGAGATCTGCCACTTCAAGATCCAGTTCC   |
| OE109              | <i>plim_1104</i> downstream region reverse primer | TATAGGATCCGCCCGCCTACATGCTTATTA             |
| OE149              | <i>pvmO</i> reverse primer                        | TATATCTAGACTAGAGCACCTTTTCGATGGTC           |
| OE189              | <i>pvmJ</i> upstream region forward primer        | TATAGAATTCATGAGATCTCATGGGTTGTAGTGCATTG     |
| OE190              | <i>pvmJ</i> upstream region reverse primer        | TATAGGATCCCGATTCCGGTCTTTTCATCTGGCT         |
| OE191              | <i>pvmJ</i> downstream region forward primer      | TATAGAATTCATGAGATCTTTTCACACGCAGCCGCC       |
| OE192              | <i>pvmJ</i> downstream region reverse primer      | TATAGGATCCGGGACTTTGTCTGGTCGTTTA            |
| OE193              | <i>pvmN</i> upstream region forward primer        | TATAGAATTCATGAGATCTAGGAGTGGCACCATGAGATT    |
| OE194              | <i>pvmN</i> upstream region reverse primer        | TATAGGATCCATGATCGTTGTGGGTTGTGA             |
| OE195              | <i>pvmN</i> downstream region forward primer      | TATAGAATTCATGAGATCTGCTGGTGAAGATGATCACCGAGC |
| OE196              | <i>pvmN</i> downstream region reverse primer      | TATAGGATCCATGACATCGCTATTGGCACA             |
| OE206              | <i>pvmH</i> forward primer                        | TATACATATGTTCTTCGCACGCGTC                  |
| OE215              | <i>pvmM</i> forward primer                        | TATACATATGAGATTAGCCGAAGTGATTGGCC           |
| OE255              | <i>pvmD</i> upstream region forward primer        | TATAGAATTCATGAGATCTATGTCTCTGATTCTGTGGTTGC  |
| OE284              | <i>pvmD</i> upstream region reverse primer        | TATAGGATCCGAAAACCTTCTCTCAAGAAATGGAAC       |
| OE285              | <i>pvmE</i> downstream region forward primer      | TATAGAATTCATGAGATCTGGTTGTCTTGGGTGGGATCG    |
| OE286              | <i>pvmG</i> reverse primer                        | TATAGGATCCCTAGGACTTTGAAAGAAGTTCGGC         |
| OE288              | <i>pvmE</i> downstream region reverse primer      | TATAGGATCCGGCTACTGTTCTCGCCAATT             |

**Table S3.** Genomes and accession numbers of genes used in phylogenetic analysis for Figure 1B and

Supplementary Figures S1A and S1B.

| Phylum         | Species                                                   | <i>pduL</i> homolog accession(s)             |            | <i>pduP</i> homolog accession(s)             |            |
|----------------|-----------------------------------------------------------|----------------------------------------------|------------|----------------------------------------------|------------|
|                |                                                           | GenBank                                      | IMG        | GenBank                                      | IMG        |
| Actinobacteria | <i>Atopobium fossor</i> DSM 15642                         |                                              | 2512382991 |                                              | 2523432309 |
| Actinobacteria | <i>Collinsella tanakaei</i> YIT 12063                     |                                              | 2514564925 |                                              | 2514564922 |
| Actinobacteria | <i>Olsenella uli</i> VPI, DSM 7084                        | YP_003800316                                 |            | YP_003800320                                 |            |
| Firmicutes     | <i>Acetobacterium woodii</i> WB1,<br>DSM 1030             |                                              | 2512382991 |                                              | 2512382985 |
| Firmicutes     | <i>Alkaliphilus metalliredigens</i><br>QYMF               | YP_001318154<br>YP_001321599                 |            | YP_001318151<br>YP_001321600                 |            |
| Firmicutes     | <i>Bacillus azotoformans</i> LMG<br>9581                  |                                              | 2524346580 |                                              | 2524346575 |
| Firmicutes     | <i>Clostridium botulinum</i> Bf                           | ZP_02618436                                  |            | ZP_02618437                                  |            |
| Firmicutes     | <i>Clostridium carboxidivorans</i><br>P7, DSM 15243       | ZP_06853152<br>ZP_06856827                   |            | ZP_06853151<br>ZP_06855343                   |            |
| Firmicutes     | <i>Clostridium difficile</i> VPI<br>10463, ATCC 43255     |                                              | 2512433896 |                                              | 2512433893 |
| Firmicutes     | <i>Clostridium ljungdahlii</i> PETC,<br>DSM 13528         | YP_003782098                                 |            | YP_003779366                                 |            |
| Firmicutes     | <i>Clostridium methylpentosum</i><br>R2, DSM 5476         | ZP_03705299                                  |            | ZP_03705305                                  |            |
| Firmicutes     | <i>Clostridium phytofermentans</i><br>ISDg                | YP_001559739<br>YP_001558300<br>YP_001558543 |            | YP_001559742<br>YP_001558295<br>YP_001558542 |            |
| Firmicutes     | <i>Clostridium sporogenes</i> ATCC<br>15579               | ZP_02995752                                  |            | ZP_02995751                                  |            |
| Firmicutes     | <i>Enterococcus faecalis</i><br>AR01/DG                   | ZP_05593144                                  |            | ZP_05593147                                  |            |
| Firmicutes     | <i>Eubacterium limosum</i><br>KIST612                     | YP_003961982                                 |            | YP_003961977                                 |            |
| Firmicutes     | <i>Geobacillus</i><br><i>thermoglucosidasius</i> C56-YS93 | YP_004587975                                 |            | YP_004587980                                 |            |
| Firmicutes     | <i>Lactobacillus reuteri</i> SD2112,<br>ATCC 55730        | YP_004649427                                 |            | YP_004649422                                 |            |
| Firmicutes     | <i>Listeria monocytogenes</i> M7                          | AEH92193                                     |            | AEH92176                                     |            |
| Firmicutes     | <i>Ruminococcus gnavus</i> ATCC<br>29149                  | ZP_02040264                                  |            | ZP_02040258                                  |            |

|                         |                                                                    |                            |                            |            |
|-------------------------|--------------------------------------------------------------------|----------------------------|----------------------------|------------|
| <i>Firmicutes</i>       | <i>Ruminococcus obeum</i> ATCC 29174                               | ZP_01962375                | ZP_01962381                |            |
| <i>Firmicutes</i>       | <i>Shuttleworthia satelles</i> DSM 14600                           | ZP_04454648                | ZP_04454656                |            |
| <i>Firmicutes</i>       | <i>Streptococcus merionis</i> DSM 19192                            |                            | 2515206018                 | 2515206798 |
| <i>Firmicutes</i>       | <i>Thermoanaerobacterium saccharolyticum</i> JW/SL-YS485, DSM 8691 |                            | 2519480168                 | 2519480174 |
| <i>Firmicutes</i>       | <i>Thermoanaerobacterium xylanolyticum</i> LX-11, DSM 7097         | YP_004471771               | YP_004471777               |            |
| <i>Fusobacteria</i>     | <i>Fusobacterium</i> sp. 1_1_41FAA                                 | ZP_08600040                | ZP_08600044                |            |
| <i>Fusobacteria</i>     | <i>Fusobacterium</i> sp. 11_3_2                                    |                            | 2514694583                 | 2514694579 |
| <i>Fusobacteria</i>     | <i>Fusobacterium</i> sp. 12_1B                                     | ZP_06748804                | ZP_06748808                |            |
| <i>Fusobacteria</i>     | <i>Fusobacterium</i> sp. 3_1_33                                    | ZP_05815059                | ZP_05815063                |            |
| <i>Fusobacteria</i>     | <i>Fusobacterium ulcerans</i> ATCC 49185                           | ZP_05632380                | ZP_05632384                |            |
| <i>Fusobacteria</i>     | <i>Fusobacterium varium</i> ATCC 27725                             | ZP_04860876<br>ZP_04860159 | ZP_04860880<br>ZP_04860157 |            |
| <i>Fusobacteria</i>     | <i>Ilyobacter polytropus</i> CuHBu1, DSM 2926                      | YP_003968462               | YP_003968466               |            |
| <i>Fusobacteria</i>     | <i>Leptotrichia buccalis</i> C-1013-b, DSM 1135                    | YP_003162997               | YP_003162999               |            |
| <i>Fusobacteria</i>     | <i>Leptotrichia hofstadii</i> F0254                                | ZP_05902074                | ZP_05902076                |            |
| <i>Fusobacteria</i>     | <i>Sebaldella termitidis</i> ATCC 33386                            | YP_003307845               | YP_003307836               |            |
| <i>Gemmatimonadetes</i> | <i>Gemmatimonadetes bacterium</i> JGI 0000112-M07                  |                            | 2517735326                 | 2517733962 |
| <i>Ignavibacteria</i>   | <i>Melioribacter roseus</i> P3M                                    |                            | 2517204486                 | 2517204481 |
| <i>Planctomycetes</i>   | <i>Blastopirellula marina</i> SH 106T, DSM 3645                    | ZP_01094341                | ZP_01094335                |            |
| <i>Planctomycetes</i>   | <i>Isosphaera pallida</i> IS1B, ATCC 43644                         | YP_004178757               | YP_004178763               |            |
| <i>Planctomycetes</i>   | <i>Pirellula staleyi</i> DSM 6068                                  | YP_003371803               | YP_003371808               |            |
| <i>Planctomycetes</i>   | <i>Planctomyces brasiliensis</i> IFAM 1448, DSM 5305               | YP_004271671               | YP_004271677               |            |
| <i>Planctomycetes</i>   | <i>Planctomyces limnophilus</i> Mu 290, DSM 3776                   | YP_003629786               | YP_003629780               |            |

|                        |                                                                          |              |              |
|------------------------|--------------------------------------------------------------------------|--------------|--------------|
| <i>Planctomycetes</i>  | <i>Planctomyces maris DSM</i><br>8797                                    | ZP_01855342  | ZP_01855336  |
| <i>Planctomycetes</i>  | <i>Rhodopirellula baltica SH 1</i>                                       | NP_865043    | NP_865037    |
| <i>Planctomycetes</i>  | <i>Singulisphaera acidiphila</i><br>MOB10, DSM 18658                     |              | 2509618795   |
| <i>Proteobacteria</i>  | <i>Citrobacter freundii ATCC</i><br>8090                                 |              | 2520192262   |
| <i>Proteobacteria</i>  | <i>Escherichia coli MS 116-1</i>                                         | ZP_07163384  | ZP_07163393  |
| <i>Proteobacteria</i>  | <i>Klebsiella pneumoniae 342</i>                                         | YP_002236775 | YP_002236771 |
| <i>Proteobacteria</i>  | <i>Pectobacterium wasabiae</i><br>WPP163                                 | YP_003261437 | YP_003261430 |
| <i>Proteobacteria</i>  | <i>Rhodobacter sphaeroides</i><br>WS8N                                   | ZP_08415799  | ZP_08415804  |
| <i>Proteobacteria</i>  | <i>Rhodopseudomonas palustris</i><br>BisB18                              | YP_531051    | YP_531056    |
| <i>Proteobacteria</i>  | <i>Salmonella enterica enterica sv</i><br><i>Typhimurium LT2</i>         | NP_460992    | NP_460996    |
| <i>Proteobacteria</i>  | <i>Shewanella putrefaciens CN-32</i>                                     |              | 2524134173   |
| <i>Spirochaetes</i>    | <i>Brachyspira intermedia</i><br>PWS/A                                   |              | 2511986595   |
| <i>Synergistetes</i>   | <i>Anaerobaculum</i><br><i>hydrogeniformans ATCC</i><br>BAA-1850         | ZP_06440568  | ZP_06440562  |
| <i>Synergistetes</i>   | <i>Anaerobaculum mobile NGA,</i><br>DSM 13181                            | AFM20793     | AFM20799     |
| <i>Synergistetes</i>   | <i>Cloacibacillus eoryensis 158,</i><br>DSM 19522                        |              | 2510278482   |
| <i>Synergistetes</i>   | <i>Dethiosulfovibrio</i><br><i>peptidovorans SEBR 4207,</i><br>DSM 11002 |              | 2501566260   |
| <i>Synergistetes</i>   | <i>Thermanaerovibrio</i><br><i>acidaminovorans Su883, DSM</i><br>6589    | YP_003316598 | YP_003316596 |
| <i>Synergistetes</i>   | <i>Thermanaerovibrio velox Z-</i><br>9701, DSM 12556                     |              | 2508842204   |
| <i>Synergistetes</i>   | <i>Thermovirga lienii Cas60314,</i><br>DSM 17291                         |              | 2505285803   |
| <i>Unclassified</i>    | <i>Bacillus sp. URHB0009</i>                                             |              | 2523076465   |
| <i>Verrucomicrobia</i> | <i>Opitutaceae bacterium sp.</i><br>TAV1                                 |              | 2508839157   |

---

|                        |                                                     |              |            |              |
|------------------------|-----------------------------------------------------|--------------|------------|--------------|
| <i>Verrucomicrobia</i> | <i>Opitutaceae sp. TAV2</i>                         |              | 2517755627 | 2517755621   |
| <i>Verrucomicrobia</i> | <i>Opitutaceae sp. TAV5</i>                         |              | 2510264820 | 2510264826   |
| <i>Verrucomicrobia</i> | <i>Opitutus terrae PB90-1</i>                       | YP_001818174 |            | YP_001818180 |
| <i>Verrucomicrobia</i> | <i>Verrucomicrobia bacterium</i><br>SCGC AAA164-E04 |              | 2236429775 | 2236429769   |
| <i>Verrucomicrobia</i> | <i>Verrucomicrobiales sp.</i><br>DG1235             | ZP_05056059  |            | ZP_05055688  |

---

**Table S4.** Accession numbers and references for genes in Table 2.

| <b>Gene Name</b> | <b>Accession</b> | <b>Reference(s) for (Predicted) Function</b> |
|------------------|------------------|----------------------------------------------|
| <i>PduA</i>      | NP_460983        | (1)                                          |
| <i>PduB</i>      | NP_460984        | (2–4)                                        |
| <i>PduC</i>      | NP_460985        | (5)                                          |
| <i>PduD</i>      | NP_460986        | (5)                                          |
| <i>PduE</i>      | NP_460987        | (5)                                          |
| <i>PduJ</i>      | NP_460990        | (2-4)                                        |
| <i>PduK</i>      | NP_460991        | (2-4)                                        |
| <i>PduL</i>      | NP_460992        | (6)                                          |
| <i>PduN</i>      | NP_460994        | (2-4)                                        |
| <i>PduP</i>      | NP_460996        | (7)                                          |
| <i>PduQ</i>      | NP_460997        | (8)                                          |
| <i>PduT</i>      | NP_460999        | (2-4)                                        |
| <i>PduU</i>      | NP_461000        | (2-4)                                        |
| <i>PduW</i>      | NP_461002        | (9)                                          |
| <i>Ack</i>       | NP_461279        | (10)                                         |
| <i>EutB</i>      | NP_461393        | (11, 12)                                     |
| <i>EutC</i>      | NP_461392        | (10, 11)                                     |
| <i>EutD</i>      | NP_461401        | (13)                                         |
| <i>EutE</i>      | NP_461398        | (14)                                         |
| <i>EutG</i>      | NP_461396        | (15, 16)                                     |
| <i>EutK</i>      | NP_461390        | (17)                                         |
| <i>EutL</i>      | NP_461391        | (17)                                         |
| <i>EutM</i>      | NP_461400        | (17)                                         |
| <i>EutN</i>      | NP_461399        | (17)                                         |
| <i>EutS</i>      | NP_461405        | (17)                                         |
| <i>Cphy_1174</i> | YP_001558291     | (18)                                         |
| <i>Cphy_1176</i> | YP_001558293     | (18)                                         |
| <i>Cphy_1177</i> | YP_001558294     | (18)                                         |
| <i>Cphy_1178</i> | YP_001558295     | (18)                                         |
| <i>Cphy_1179</i> | YP_001558296     | (18)                                         |
| <i>Cphy_1180</i> | YP_001558297     | (18)                                         |
| <i>Cphy_1181</i> | YP_001558298     | (18)                                         |
| <i>Cphy_1182</i> | YP_001558299     | (18)                                         |
| <i>Cphy_1183</i> | YP_001558300     | (18)                                         |
| <i>Cphy_1184</i> | YP_001558301     | (18)                                         |
| <i>Cphy_1185</i> | YP_001558302     | (18)                                         |
| <i>Cphy_1186</i> | YP_001558303     | (18)                                         |



## Supplemental References

1. **Havemann GD, Sampson EM, Bobik TA.** 2002. PduA Is a Shell Protein of Polyhedral Organelles Involved in Coenzyme B<sub>12</sub>-Dependent Degradation of 1,2-Propanediol in *Salmonella enterica* Serovar Typhimurium LT2. *J. Bacteriol.* **184**:1253–1261.
2. **Bobik TA, Havemann GD, Busch RJ, Williams DS, Aldrich HC.** 1999. The Propanediol Utilization (*pdu*) Operon of *Salmonella enterica* serovar Typhimurium LT2 Includes Genes Necessary for Formation of Polyhedral Organelles Involved in coenzyme B<sub>12</sub>-Dependent 1, 2-Propanediol Degradation. *J. Bacteriol.* **181**:5967–75.
3. **Parsons JB, Dinesh SD, Deery E, Leech HK, Brindley A a, Heldt D, Frank S, Smales CM, Lünsdorf H, Rambach A, Gass MH, Bleloch A, McClean KJ, Munro AW, Rigby SEJ, Warren MJ, Prentice MB.** 2008. Biochemical and structural insights into bacterial organelle form and biogenesis. *J. Biol. Chem.* **283**:14366–75.
4. **Cheng S, Sinha S, Fan C, Liu Y, Bobik TA.** 2011. Genetic Analysis of the Protein Shell of the Microcompartments Involved in Coenzyme B<sub>12</sub>-Dependent 1,2-Propanediol Degradation by *Salmonella*. *J. Bacteriol.* **193**:1385–92.
5. **Bobik TA, Xu Y, Jeter RM, Otto KE, Roth JR.** 1997. Propanediol Utilization Genes (*pdu*) of *Salmonella typhimurium*: Three Genes for the Propanediol Dehydratase. *J. Bacteriol.* **179**:6633–6639.
6. **Liu Y, Leal NA, Sampson EM, Johnson CL V, Havemann GD, Bobik T a.** 2007. PduL is an Evolutionarily Distinct Phosphotransacylase Involved in B<sub>12</sub>-dependent 1,2-propanediol degradation by *Salmonella enterica* serovar typhimurium LT2. *J. Bacteriol.* **189**:1589–96.
7. **Leal NA, Havemann GD, Bobik TA.** 2003. PduP is a coenzyme-a-acylating propionaldehyde dehydrogenase associated with the polyhedral bodies involved in B<sub>12</sub>-dependent 1,2-propanediol degradation by *Salmonella enterica* serovar Typhimurium LT2. *Arch. Microbiol.* **180**:353–61.
8. **Cheng S, Fan C, Sinha S, Bobik TA.** 2012. The PduQ enzyme is an alcohol dehydrogenase used to recycle NAD<sup>+</sup> internally within the Pdu microcompartment of *Salmonella enterica*. *PLoS One* **7**:e47144.
9. **Palacios S, Starai VJ, Escalante-Semerena JC.** 2003. Propionyl Coenzyme A Is a Common Intermediate in the 1,2-Propanediol and Propionate Catabolic Pathways Needed for Expression of the *prpBCDE* Operon during Growth of *Salmonella enterica* on 1,2-Propanediol. *J. Bacteriol.* **185**:2802–2810.



10. **Starai VJ, Garrity J, Escalante-Semerena JC.** 2005. Acetate excretion during growth of *Salmonella enterica* on ethanolamine requires phosphotransacetylase (EutD) activity, and acetate recapture requires acetyl-CoA synthetase (Acs) and phosphotransacetylase (Pta) activities. *Microbiology* **151**:3793–801.
11. **Bradbeer C.** 1965. The Clostridial Fermentations of Choline II. Requirement For A Cobamide Coenzyme by an Ethanolamine Deaminase. *J. Biol. Chem.* **240**:4675–4681.
12. **Scarlett FA, Turner JM.** 1976. Microbial Metabolism of Amino Alcohols. Ethanolamine Catabolism Mediated by Coenzyme B<sub>12</sub>-dependent Ethanolamine Ammonia-Lyase in *Escherichia coli* and *Klebsiella aerogenes*. *J. Gen. Microbiol.* **95**:173–176.
13. **Brinsmade SR, Escalante-Semerena JC.** 2004. The *eutD* Gene of *Salmonella enterica* Encodes a Protein with Phosphotransacetylase Enzyme Activity. *J. Bacteriol.* **186**:1890–1892.
14. **Roof DM, Roth JR.** 1989. Functions required for vitamin B<sub>12</sub>-dependent ethanolamine utilization in *Salmonella typhimurium*. *J. Bacteriol.* **171**:3316–23.
15. **Stojiljkovic I, Bäumlner AJ, Heffron F.** 1995. Ethanolamine utilization in *Salmonella typhimurium*: nucleotide sequence , protein expression , and mutational analysis of the *cchA cchB eutE eutJ eutG eutH* gene cluster. *J. Bacteriol.* **177**:1357 – 1366.
16. **Penrod JT, Roth JR.** 2006. Conserving a Volatile Metabolite: a Role for Carboxysome-Like Organelles in *Salmonella enterica*. *J. Bacteriol.* **188**:2865 – 2874.
17. **Kofoed E, Rappleye C, Stojiljkovic I, Roth J.** 1999. The 17-Gene Ethanolamine (*eut*) Operon of *Salmonella typhimurium* Encodes Five Homologues of Carboxysome Shell Proteins. *J. Bacteriol.* **181**:5317–29.
18. **Petit E, Latouf WG, Coppi M V, Warnick TA, Currie D, Romashko I, Deshpande S, Haas K, Alvelo-Maurosa JG, Wardman C, Schnell DJ, Leschine SB, Blanchard JL.** 2013. Involvement of a Bacterial Microcompartment in the Metabolism of Fucose and Rhamnose by *Clostridium phytofermentans*. *PLoS One* **8**:e54337.
